# Supplementary material for: Development of broad‐spectrum human monoclonal antibodies for rabies post‐exposure prophylaxis
Source: PubMed Central journal article supplement (PMC4818751; doi:10.15252/emmm.201505986), 2016-03-18
Supplement: EMMM-8-407-s001.pdf [file EMMM-8-407-s001.pdf]

# Appendix: Table of Contents

- Appendix Table S1. Selection of blood donors
- Appendix Table S2. Summary of all the genetic and functional characteristics of the panel of 21 isolated human RABV neutralizing antibodies.
- Appendix Table S3. Summary of the 42 RABV isolates tested in this study.
- Appendix Table S4. Summary of the characteristics of the 71 lyssaviruses tested in this study.
- Appendix Table S5. Geographic distribution of the antigenic site I and III polymorphisms of the 2566 RABV isolates analyzed.
- Appendix Figure S1. Neutralization of CVS-11 RABV by RVC20 and RVC58 antibodies combinations.

|         | CVS-1 | ABL <sup>1</sup> | DUV <sup>1</sup> | EBLV- | EBLV- | IRK <sup>1</sup> | KHU <sup>1</sup> | ARA <sup>1</sup> | LB <sup>1</sup> | SHIB <sup>1</sup> | MOK <sup>1</sup> | WCB <sup>1</sup> |
|---------|-------|------------------|------------------|-------|-------|------------------|------------------|------------------|-----------------|-------------------|------------------|------------------|
| Berirab | 907   | 10943            | 259              | 138   | -     | -                | 143              | 278              | -               | -                 | 23               | -                |
| RVA     | 6056  | 9143             | 782              | 2811  | 130   | 195              | 2727             | 1074             | 452             | 76                | 64               | -                |
| RVE     | 18577 | 56911            | 1347             | 6755  | 544   | 212              | 2543             | 6209             | 104             | 193               | 448              | 34               |
| RVC     | 1486  | 978              | 346              | 1682  | 136   | 169              | 2400             | 372              | 97              | 30                | 26               | 32               |
| RVD     | 3307  | 751              | -                | 735   | 77    | 199              | 1063             | 396              | -               | -                 | 42               | -                |
| RVE     | 2524  | 18735            | 507              | 2391  | 351   | 208              | 2017             | 953              | 246             | 28                | 159              | 32               |
| 6       | 1028  | 3422             | 621              | 188   | 115   | 38               | 40               | 199              | -               | -                 | 70               | -                |
| 9       | 1354  | 8087             | 441              | 630   | 43    | 270              | 66               | 375              | -               | -                 | -                | -                |
| 10      | 2235  | 7463             | 731              | 564   | 325   | 1022             | 1220             | 1045             | -               | 17                | 697              | -                |
| 17      | 511   | 2155             | 46               | -     | -     | 34               | 31               | 116              | 24              | -                 | 45               | -                |
| 20      | 4690  | 30125            | 94               | 1411  | 172   | 2209             | 1308             | 862              | 18              | 28                | 396              | -                |
| 25      | 565   | 23126            | 75               | 50    | -     | 661              | 123              | 149              | -               | -                 | -                | -                |
| 27      | 782   | 27790            | 110              | 94    | 157   | 541              | 79               | 373              | -               | -                 | -                | -                |
| 31      | 165   | 5339             | -                | 47    | -     | -                | 34               | -                | -               | -                 | 48               | -                |
| 37      | 169   | 258              | 47               | -     | -     | 29               | 49               | 272              | -               | -                 | 71               | -                |
| 49      | 178   | 1120             | -                | -     | -     | 27               | 58               | 102              | 77              | -                 | -                | -                |
| 50      | 2463  | 3834             | 145              | 167   | 206   | 625              | 124              | 447              | -               | -                 | -                | -                |
| 51      | 398   | 2661             | 56               | -     | -     | 35               | 63               | 236              | -               | -                 | -                | -                |
| 56      | 1185  | 401              | 147              | 483   | 328   | 225              | 357              | 412              | -               | 64                | 42               | -                |
| 57      | 343   | 3124             | 64               | -     | 101   | 212              | 86               | 144              | -               | -                 | -                | -                |
| 58      | 373   | 365              | 117              | -     | 38    | 47               | 111              | 173              | -               | -                 | 32               | -                |
| 64      | 867   | 26957            | 128              | 135   | 29    | 77               | 173              | 162              | -               | -                 | 43               | -                |
| 66      | 62256 | 10875            | 171              | 3606  | 48565 | 637              | 862              | 1016             | -               | -                 | 89               | -                |
| 67      | 32280 | 3705             | 176              | 6083  | 10769 | 194              | 110              | 431              | -               | -                 | 119              | -                |
| 75      | 1119  | 117              | 68               | 72    | -     | 57               | 111              | 96               | -               | -                 | 18               | -                |
| 79      | -     | -                | 941              | 929   | 419   | 34880            | 32               | 24               | -               | -                 | -                | -                |
| 82      | 226   | 26734            | 62               | -     | -     | 40               | 82               | 92               | -               | -                 | -                | -                |
| 86      | 421   | 1613             | 78               | 31    | 20    | 24               | 59               | 103              | -               | -                 | -                | -                |
| 88      | 438   | 1074             | 29               | -     | -     | -                | 51               | 170              | 93              | -                 | 37               | -                |
| 89      | 682   | 3137             | 78               | 148   | 108   | 94               | 35               | 489              | -               | -                 | 46               | -                |

**Appendix Table S1. Selection of blood donors.** Neutralization of 12 different pseudotypes lyssaviruses by a panel of 29 plasma samples from RABV vaccinees expresses as ID50 titers.

|        | Donor | Isotype | HEAVY CHAIN |       |       |       |          |                 | LIGHT CHAIN |          |        |       | CVS-11 pp-neutralization<br>(IC90 ng/ml) | Neutralization<br>potency ratio<br>vs Berirab<br>folds | WB           |      |
|--------|-------|---------|-------------|-------|-------|-------|----------|-----------------|-------------|----------|--------|-------|------------------------------------------|--------------------------------------------------------|--------------|------|
|        |       |         | VH          | % nts | JH    | % nts | DH       | HCDR3<br>length | VL/VK       | %<br>nts | JL/JK  | % nts |                                          |                                                        | Non-<br>red. | Red. |
| CR057  |       | IgG1 λ  | V1-69*01    | na    | J5*02 | na    | D3-10*02 | na              | VL2-11*02   | na       | JL2*01 | na    | 1                                        | 987                                                    | ++           | -    |
| CR4098 |       | IgG1 κ  | V3-33*03    | na    | J4*02 | na    | D6-19*01 | na              | VK1-17*01   | na       | JK1*01 | na    | 8                                        | 123                                                    | ++           | -    |
| RAB1   |       | IgG1 κ  | V3-33*03    | na    | J4*02 | na    | D6-6*01  | na              | VK3D-11*02  | na       | JK1*01 | na    | 49                                       | 20                                                     | ND           | ND   |
| RVA122 | A     | IgG1 λ  | V4-59*03    | 95%   | J6*02 | 89%   | D4-17*01 | 17              | VL1-47*01   | 94%      | JL3*02 | 92%   | 0,03                                     | 32900                                                  | +            | -    |
| RVA144 | A     | IgG3 λ  | V4-39*01    | 92%   | J5*02 | 84%   | D4-4*01  | 12              | VL1-40*01   | 97%      | JL2*01 | 92%   | 0,09                                     | 10967                                                  | +            | -    |
| RVA125 | A     | IgG1 κ  | V2-5*10     | 96%   | J4*02 | 90%   | D6-13*01 | 15              | VK1-12*01   | 97%      | JK4*01 | 100%  | 0,5                                      | 1974                                                   | +            | -    |
| RVB185 | B     | IgG1 λ  | V4-39*01    | 89%   | J4*02 | 85%   | D3-9*01  | 11              | VL1-44*01   | 95%      | JL3*02 | 97%   | 0,3                                      | 3290                                                   | ++           | -    |
| RVB492 | B     | IgG1 λ  | V3-23*01    | 90%   | J4*02 | 98%   | D3-10*01 | 18              | VL-2-11*01  | 97%      | JL2*01 | 97%   | 0,2                                      | 4935                                                   | -            | -    |
| RVB143 | B     | IgG1 λ  | V1-46*01    | 93%   | J6*02 | 90%   | D2-21*01 | 20              | VL2-14*01   | 94%      | JL2*01 | 84%   | 317                                      | 3                                                      | ++           | +    |
| RVB161 | B     | IgG1 λ  | V4-39*01    | 96%   | J4*02 | 88%   | D4-17*01 | 14              | VL1-44*01   | 98%      | JL3*02 | 100%  | 0,08                                     | 12338                                                  | -            | -    |
| RVB181 | B     | IgG3 λ  | V3-30*02    | 91%   | J6*02 | 82%   | D1-26*01 | 15              | VL1-40*01   | 94%      | JL2*01 | 89%   | 1,4                                      | 705                                                    | +            | -    |
| RVB686 | B     | IgG1 κ  | V3-30*04    | 95%   | J2*01 | 94%   | D6-6*01  | 15              | VK1-5*01    | 93%      | JK1*01 | 97%   | 0,6                                      | 1645                                                   | +            | -    |
| RVC03  | C     | IgG1 κ  | V3-23*01    | 91%   | J4*02 | 94%   | D3-3*01  | 16              | VK1-44*01   | 96%      | JK3*02 | 97%   | 1                                        | 987                                                    | +            | -    |
| RVC20  | C     | IgG3 κ  | V4-31*06    | 96%   | J4*02 | 90%   | D3-3*01  | 16              | VK1-16*01   | 98%      | JK4*01 | 100%  | 0,1                                      | 9870                                                   | ++           | -    |
| RVC21  | C     | IgG3 λ  | V4-39*01    | 93%   | J5*01 | 80%   | D4-17*01 | 13              | VL1-51*01   | 96%      | JL1*01 | 100%  | 0,04                                     | 24675                                                  | +            | -    |
| RVC38  | C     | IgG3 κ  | V1-69*06    | 91%   | J4*02 | 85%   | D5-24*01 | 14              | VK1-9*01    | 96%      | JK4*04 | 100%  | 0,01                                     | 98700                                                  | -            | -    |
| RVC44  | C     | IgG3 κ  | V3-21*01    | 92%   | J3*02 | 86%   | D6-19*01 | 17              | VK1-39*01   | 95%      | JK1*01 | 100%  | 0,7                                      | 1410                                                   | ++           | +    |
| RVC58  | C     | IgG1 λ  | V3-23*04    | 96%   | J6*02 | 95%   | D2-15*01 | 17              | VL2-14*01   | 99%      | JL2*01 | 94%   | 0,01                                     | 98700                                                  | -            | -    |
| RVC68  | C     | IgG1 κ  | V4-59*01    | 93%   | J6*03 | 89%   | D4-17*01 | 14              | VK1-12*01   | 96%      | JK2*01 | 94%   | 9                                        | 110                                                    | +            | +    |
| RVC111 | C     | IgG1 κ  | V3-30*04    | 98%   | J4*02 | 94%   | D1-14*01 | 13              | VK1-5*01    | 96%      | JK1*01 | 95%   | 0,6                                      | 1645                                                   | -            | -    |
| RVC04  | C     | IgG3 λ  | V3-30*03    | 95%   | J6*02 | 77%   | D1-7*01  | 15              | VL1-40*01   | 96%      | JL3*01 | 97%   | 0,02                                     | 49350                                                  | +            | -    |
| RVC56  | C     | IgG3 κ  | V3-7*01     | 98%   | J6*02 | 98%   | D3-10*01 | 20              | VK1-15*03   | 98%      | JK2*01 | 97%   | 0,03                                     | 32900                                                  | -            | -    |
| RVC69  | C     | IgG3 κ  | V1-69*01    | 92%   | J4*02 | 92%   | D5-24*01 | 16              | VK1-9*01    | 94%      | JK4*01 | 95%   | 0,13                                     | 7592                                                   | ND           | -    |
| RVD74  | D     | IgG1 λ  | V3-48*02    | 94%   | J4*02 | 98%   | D5-5*01  | 21              | VL2-14*01   | 92%      | JL2*01 | 91%   | 0,03                                     | 32900                                                  | ++           | -    |

**Appendix Table S2. Summary of all the genetic and functional characteristics of the panel of 21 isolated human RABV neutralizing antibodies.** Shown are VH, VL and VK usage, the percentage of nucleotide identity to the corresponding germline gene, the neutralization potency on CVS-11 RABV pseudoviruses expressed as the concentration of IgG in ng/ml able to neutralize 90% of viral infectivity (IC90) and the reactivity of the antibodies in western blot (WB) under non-reducing or reducing conditions.

| Isolate name                                   | RVC58         | RVC20            | CR57  | CR4098        | RAB1 | HRIG (Beritab)     | Neutralization assay used* |
|------------------------------------------------|---------------|------------------|-------|---------------|------|--------------------|----------------------------|
| 9704                                           | 6             | 83               | 63    | 83            | 5    | 188                | RFFIT                      |
| Botswana/dog/BNVL2009-3580/V5493-2010          | 2             | 18               | 15    | 6             | 10   | n.e.               | FAVN                       |
| Botswana/honey badger/BNVL2009-6665/V5493-2010 | 21            | 46               | 7     | 27            | 13   | n.e.               | FAVN                       |
| Burkina Faso/dog/139-2007/V6155-2007           | 46            | 27               | 855   | 3524          | 908  | 12192              | FAVN                       |
| Burkina Faso/dog/9-2007/V6155-2007             | 0,18          | 0,42             | 262   | 2376          | 483  | 12000              | RFFIT                      |
| 02045                                          | 1             | 133              | 4     | 445           | 1    | 1604               | RFFIT                      |
| France/red fox/GS7 1-11-1990/V1039-2011        | 21            | 46               | 515   | 43            | 3,79 | 9356               | FAVN                       |
| Pasteur Virus (PV)-Paris-93127                 | 56            | 1                | 56    | 24            | ND   | 14                 | RFFIT                      |
| 9001                                           | 63            | 140              | 41    | 130           | ND   | 140                | RFFIT                      |
| Italy/dog/V3425/2009                           | 3             | 43               | 74    | 33            | 4.94 | 12315              | FAVN                       |
| Italy/human/V117/1996 (Nepal)                  | 1             | 0,41             | 55    | 18            | 3    | 7894               | RFFIT                      |
| Italy/red fox/V673/2011                        | 21            | 105              | 378   | 43            | 30   | n.e.               | FAVN                       |
| Brazil/bat/260-08/RS1249-2013                  | 415           | 873              | 678   | 60            |      | 12192              | FAVN                       |
|                                                | 7,9           | 6,15             | 969   | 11            | 460  | 3464               | RFFIT                      |
| Brazil/bovine/303-2011/RS1040-2012             | 1,23          | 9,8              | 96    | 31            | 73   | 1080               | RFFIT                      |
| Brazil/kinkajou/RS3609-5-2011                  | 2             | 2                | 520   | 1571          | 4153 | 5509               | FAVN                       |
| Challenge virus strain (CVS)-11                | 13/16/<br>0.1 | 1171,<br>20, 0.1 | 2841  | 56/440<br>8/4 | 4,20 | 58054/57<br>78/987 | FAVN/RFFIT/PV              |
| 9508SAD BERN                                   | 7             | 1                | 1000  | 23600         | 1    | 221300             | RFFIT                      |
| Niger/Dog/105-251-2007/V6097-2007              | 21            | 27               | 515   | 4593          | 1543 | 16258              | FAVN                       |
| 04030                                          | 6             | 6                | 13    | 543           | 2    | 4233               | RFFIT                      |
| Poland/racoon dog/1985/V3229-2009              | 20            | 27               | 377   | 33            | 154  | n.e.               | FAVN                       |
| 9141                                           | 10            | 11               | 22    | 930           | 1294 | 10965              | RFFIT                      |
| Spain/dog/201020958-2010/RS639-2012            | 2,23          | 3,4              | 121   | 6,2           | 3    | 5288               | RFFIT                      |
| 8743                                           | 7             | 3                | 66    | 99            | 2    | 1700               | RFFIT                      |
| Tunisia/dog/ARIANA2-1991/V3951-2010            | 21            | 15               | 113   | 16            | 8    | n.e.               | FAVN                       |
| ERA (Evelyn Rokitniki Abelseth)                | 0.3           | 0.3              | 0.8   | 0.7           | <7   | 1086               | PV                         |
| CVS 9.13                                       | 21            | 7                | 24    | 23600         |      | 1700               | RFFIT                      |
| RV250                                          | 21,5          | 2,2              | 84,5  | 0,6           | 0,2  |                    | PV                         |
| RV193                                          | 12,8          | 0,6              | 38,4  | 0,4           | 1,4  |                    | PV                         |
| RV277                                          | 13,9          | 1,5              | 100,3 | 0,3           | 1,3  |                    | PV                         |
| RV61                                           | 15,1          | 0,08             | 54,7  | 0,09          | 0,07 |                    | PV                         |
| 93033ISR                                       | 3,1           | 2,4              | 13,5  | <0.08         | 0,1  |                    | PV                         |
| 86081IRA                                       | <7            | <7               | <7    | <7            | <7   |                    | PV                         |
| 91004USA                                       | 8,7           | 21               | 319,5 | 0,08          | 8,4  |                    | PV                         |
| Mauritania/dog/2019-2006/V6235-2007            | 0,15          | 0,11             | 100   | 359           | 206  | 9704               | FAVN                       |
| Pittman More strain (PM) (PV12?)               | 66            | NA               | 100   | 21            | NA   | 11200              | RFFIT                      |
| 87006TU*                                       | +             | +                | +     | +             | +    |                    | FACS                       |
| 91001USA*                                      | +             | +                | +     | +             | -    |                    | FACS                       |
| 91035OMA*                                      | +             | +                | +     | +             | +    |                    | FACS                       |
| 98011CHI*                                      | +             | +                | +     | +             | +    |                    | FACS                       |
| 09029NEP*                                      | +             | +                | -     | +             | +    |                    | FACS                       |
| 02052AFG*                                      | +             | +                | +     | +             | +    |                    | FACS                       |
| FLRC090148                                     | +/-           | +                | +/-   | +             | +    |                    | FACS                       |
| RV/R3.PHL/2008/TRa-065*                        | +             | +                | -     | +             | +    |                    | FACS                       |
| CVS11-N336S*                                   | +             | +                | +     | +             | +/-  |                    | FACS                       |

\* tested for binding to G-protein transfectants

**Appendix Table S3. Summary of the 42 RABV isolates tested in this study.** Neutralization activity (IC50 for viruses and IC90 for pseudoviruses in ng/ml) of RVC20, RVC58, CR57, CR4098 and RAB1 monoclonal antibodies and HRIG as illustrated in Figure 4. RFFIT, rapid fluorescent focus inhibition test; FAVN, fluorescent-antibody virus neutralization test; PV, pseudovirus-based neutralization assay. \*, viruses tested by FACS for binding to G protein transfectants.

| Isolate name                                   | Host species                                                   | Country of origin  | Year | Viral species | Phylogroup | Virus type | Lineage                                 | Accession number |
|------------------------------------------------|----------------------------------------------------------------|--------------------|------|---------------|------------|------------|-----------------------------------------|------------------|
| 9704                                           | <i>Tadarida brasiliensis</i> (Mexican free-tailed bat)         | Argentina          | 1997 | RABV          | I          | V          | Bat (American Indigenous)               | ABZ81200         |
| Botswana/dog/BNVL2009-3580/V5493-2010          | <i>Canis familiaris</i> (dog)                                  | Botswana           | 2009 | RABV          | I          | V          | Cosmopolitan (ex Africa 1)              | KU739040         |
| Botswana/honey badger/BNVL2009-6665/V5493-2010 | <i>Mellivora capensis</i> (honey badger)                       | Botswana           | 2009 | RABV          | I          | V          | Africa 3                                | KU739041         |
| Burkina Faso/dog/139-2007/V6155-2007           | <i>Canis familiaris</i> (dog)                                  | Burkina Faso       | 2007 | RABV          | I          | V          | Africa 2                                | KU739038         |
| Burkina Faso/dog/9-2007/V6155-2007             | <i>Canis familiaris</i> (dog)                                  | Burkina Faso       | 2007 | RABV          | I          | V          | Africa 2                                | KU739039         |
| 02045                                          | <i>Canis familiaris</i> (dog)                                  | China              | 2002 | RABV          | I          | V          | Asian 1 or 2a (China)                   | ABX46649         |
| France/red fox/GS7 1-11-1990/V1039-2011        | <i>Vulpes vulpes</i> (red fox)                                 | France             | 1990 | RABV          | I          | V          | Cosmopolitan-Western Europe             | KU739048         |
| Pasteur Virus (PV)-Paris-93127                 | na                                                             | France             | na   | RABV          | I          | V          | na                                      | KU884973         |
| 9001                                           | Dog (vampire bat virus)                                        | French Guyana      | 1990 | RABV          | I          | V          | Bat (American Indigenous)               | ABZ81185         |
| Italy/dog/V3425/2009                           | <i>Canis familiaris</i> (dog)                                  | Italy              | 2009 | RABV          | I          | V          | Cosmopolitan-Western Europe             | KU739037         |
| Italy/human/V117/1996 (Nepal)                  | <i>Homo sapiens</i>                                            | Italy              | 1996 | RABV          | I          | V          | Arctic-like-1                           | KU739036         |
| Italy/red fox/V673/2011                        | <i>Red fox</i>                                                 | Italy              | 2011 | RABV          | I          | V          | Cosmopolitan-Western Europe             | KC197967         |
| Brazil/bat/260-08/RS1249-2013                  | Bat                                                            | Brazil             | 2008 | RABV          | I          | V          | Bat (American indigenous)               | KU739047         |
| Brazil/bovine/303-2011/RS1040-2012             | <i>Desmodus rotundus</i> (vampire bat)                         | Brazil             | 2011 | RABV          | I          | V          | Bat (American indigenous)               | KU739045         |
| Brazil/kinkajou/RS3609-5-2011                  | <i>Potos flavus</i> (kinkajou)                                 | Brazil             | 2008 | RABV          | I          | V          | Bat (American indigenous)               | KU739046         |
| Challenge virus strain (CVS)-11                | na                                                             | Lab strain         | na   | RABV          | I          | V/PV       | na                                      | EU352767         |
| 9508SAD BERN                                   | na                                                             | Lab strain         | na   | RABV          | I          | V          | na                                      | ABN11309         |
| Niger/Dog/105-251-2007/V6097-2007              | <i>Canis familiaris</i> (dog)                                  | Niger              | 2007 | RABV          | I          | V          | Africa 2                                | KU739043         |
| 04030                                          | <i>Homo sapiens</i>                                            | Philippines        | 2004 | RABV          | I          | V          | Asian 2b (Philippines)                  | ABX46661         |
| Poland/raccoon dog/1985/V3229-2009             | <i>Nyctereutes procyonoides</i> (raccoon dog)                  | Poland             | 1985 | RABV          | I          | V          | Cosmopolitan, North-Eastern Europe      | KU739049         |
| 9141                                           | <i>Vulpes lagopus</i> (arctic fox)                             | Siberia, Russia    | 1988 | RABV          | I          | V          | Arctic 2 (Siberia)                      | KU899138         |
| Spain/dog/201020958-2010/RS639-2012            | <i>Canis familiaris</i> (dog)                                  | Spain (ex Morocco) | 2010 | RABV          | I          | V          | Cosmopolitan (ex Africa 1)              | KU739044         |
| 8743                                           | <i>Homo sapiens</i>                                            | Thailand           | 1983 | RABV          | I          | V          | Asian 2c (south East Asia)              | ABX46664         |
| Tunisia/dog/ARIANA2-1991/V3951-2010            | <i>Canis familiaris</i> (dog)                                  | Tunisia            | 1991 | RABV          | I          | V          | Cosmopolitan (ex Africa 1)              | KU739050         |
| ERA (Evelyn Rokitniki Abelseth)                | na                                                             | na                 | na   | RABV          | I          | PV         | na                                      | EF206707         |
| CVS 9.13                                       | na                                                             | Lab strain         | na   | RABV          | I          | V          | na                                      | O92284           |
| RV250                                          | <i>Urocyonax undulatus</i> (long-tailed ground squirrel)       | Russia (Tuva)      | na   | RABV          | I          | PV         | Arctic-like                             | KU534941         |
| RV193                                          | <i>Canis familiaris</i> (dog)                                  | Pakistan           | 1989 | RABV          | I          | PV         | Arctic-like                             | KU534940         |
| RV277                                          | <i>Capra aegagrus hircus</i> (goat)                            | Pakistan           | na   | RABV          | I          | PV         | Arctic-like                             | KU534942         |
| RV61                                           | <i>Canis familiaris</i> (dog)                                  | India              | 1987 | RABV          | I          | PV         | Arctic-like                             | KU534939         |
| 93033ISR                                       | <i>Canis familiaris</i> (dog)                                  | Israel             | 1993 | RABV          | I          | PV         | Cosmopolitan, Middle East               | KU888637         |
| 86081IRA                                       | <i>Canis familiaris</i> (dog)                                  | Iran               | 1985 | RABV          | I          | PV         | Cosmopolitan, Cosmopolitan, Middle East | KU888638         |
| 91004USA                                       | <i>Mephitis mephitis</i> (skunk)                               | USA                | 1991 | RABV          | I          | PV         | Arctic related, arctic 1                | KU888639         |
| Mauritania/dog/2019-2006/V6235-2007            | <i>Canis familiaris</i> (dog)                                  | Mauritania         | 2007 | RABV          | I          | V          | Africa 2                                | KU739042         |
| Pitman Moore strain                            | <i>Canis familiaris</i> (dog)                                  | Lab strain         | na   | RABV          | I          | V          | na                                      | AJ871962         |
| 87006TU                                        | <i>Vulpes vulpes</i> (fox)                                     | Turkey             | 1987 | RABV          | I          | G          | Cosmopolitan, America                   | KU888640         |
| 91001USA                                       | <i>Mephitis mephitis</i> (skunk)                               | USA                | 1991 | RABV          | I          | G          | Cosmopolitan, America                   | KU888641         |
| 91035OMA                                       | <i>Vulpes vulpes</i> (fox)                                     | Oman               | 1991 | RABV          | I          | G          | Arctic related, arctic like 1b          | KU888642         |
| 98011CHI                                       | <i>Canis familiaris</i> (dog)                                  | Chile              | 1998 | RABV          | I          | G          | Asia, China, Clade II                   | KU888643         |
| 09029NEP                                       | <i>Bubalus arnee</i> (wild water buffalo)                      | Nepal              | 2003 | RABV          | I          | G          | Indian subcontinent                     | KU888644         |
| 02052AFG                                       | <i>Canis familiaris</i> (dog)                                  | Afghanistan        | 2002 | RABV          | I          | G          | Cosmopolitan, Cosmopolitan, Middle East | KU888645         |
| FLRC090148                                     | <i>Procyon lotor</i> (raccoon)                                 | USA                | 2009 | RABV          | I          | G          | Cosmopolitan, America                   | AGE31951         |
| RV/R3.PHL/2008/TRA-065                         | <i>Canis familiaris</i> (dog)                                  | Philippines        | 2008 | RABV          | I          | G          | Asian 2b (Philippines)                  | BAN14123         |
| ABLV/Australia/bat/ABL1-1997/V1039-2011        | <i>Pteropus alecto</i> (Black flying fox)                      | Australia          | 1997 | ABLV          | I          | V          | na                                      | KU739052         |
| 1301 Bokeloh bat lyssavirus                    | <i>Myotis nattereri</i> (Natterer's bat)                       | France             | 2013 | BBLV          | I          | V          | na                                      | KU761304         |
| 86132SA                                        | <i>Homo sapiens</i>                                            | South Africa       | 1971 | DUVV          | I          | V          | na                                      | KU761302         |
| DUVV/SouthAfrica/human/1971/RS639-2012         | <i>Homo sapiens</i>                                            | South Africa       | 1971 | DUVV          | I          | V          | na                                      | KU739053         |
| EBLV1a/France/bat/122938-2002/V3951-2009       | <i>Eptesicus serotinus</i> (serotine bat)                      | France             | 2002 | EBLV-1        | I          | V/PV       | na                                      | KU739051         |
| EBLV1b/France/bat/8918-1989                    | <i>Eptesicus serotinus</i> (serotine bat)                      | France             | 1989 | EBLV-1        | I          | V/PV       | na                                      | EU293112         |
| EBLV2/UK/bat/RV1332-2002/V3951-2009            | <i>Myotis daubentonii</i> (Daubenton's bat)                    | UK                 | 2002 | EBLV-2        | I          | V          | na                                      | GU936871         |
| 94112                                          | <i>Myotis dasycneme</i> (pond bat)                             | Netherlands        | 1989 | EBLV-2        | I          | V          | na                                      | AA628213         |
| 02053                                          | <i>Myotis daubentonii</i> (Daubenton's bat)                    | Switzerland        | 2002 | EBLV-2        | I          | V          | na                                      | KU761301         |
| Australian bat lyssavirus/RV634                | <i>Eidolon helvum</i> (straw-coloured fruit bat)               | Australia          | 1996 | ABLV          | I          | PV         | na                                      | GU936883         |
| Aravan Virus                                   | <i>Myotis blythi</i> (Lesser Mouse-eared Bat)                  | Kyrgyzstan         | 1991 | ARAV          | I          | PV         | na                                      | EF614259         |
| Duvenhage Virus RSA2006                        | <i>Homo sapiens</i>                                            | South Africa       | 2006 | DUVV          | I          | PV         | na                                      | EU623444         |
| Duvenhage Virus ZIM86-RV131                    | <i>Nycterus thebaica</i> (Egyptian slit-faced bat)             | Zimbabwe           | 1986 | DUVV          | I          | PV         | na                                      | GU936870         |
| European bat lyssavirus 1.RV20                 | <i>Eptesicus serotinus</i> (serotine bat)                      | Denmark            | 1986 | EBLV-1        | I          | PV         | na                                      | GU936874         |
| European bat lyssavirus 1.RV9                  | <i>Eptesicus serotinus</i> (serotine bat)                      | Germany            | 1968 | EBLV-1        | I          | PV         | na                                      | EU352768         |
| European bat lyssavirus 2.RV1787               | <i>Myotis daubentonii</i> (Daubenton's bat)                    | UK                 | 2004 | EBLV-2        | I          | PV         | na                                      | EU352769         |
| European bat lyssavirus 2.RV628                | <i>Myotis daubentonii</i> (Daubenton's bat)                    | UK                 | 1996 | EBLV-2        | I          | PV         | na                                      | GU936882         |
| Irkut Virus                                    | <i>Murina leucogaster</i> (greater tube-nosed bat)             | Russia             | 2002 | IRKV          | I          | PV         | na                                      | EF614260         |
| Khujand Virus                                  | <i>Myotis mystacinus</i> (whiskered bat)                       | Tajikistan         | 2001 | KHUV          | I          | PV         | na                                      | EF614261         |
| MOK                                            | <i>Felis catus</i> (cat)                                       | Zimbabwe           | 1981 | MOK           | II         | V          | na                                      | NC006429         |
| Shimoni bat Virus                              | <i>Hipposideros commersoni</i> (Commerson's leaf-nosed bat)    | Kenya              | 2009 | SHIBV         | II         | PV         | na                                      | NC025365         |
| West Caucasian bat Virus                       | <i>Miniopterus schreibersii</i> (Schreibers' bat)              | Russia             | 2002 | WCBV          | III        | PV         | na                                      | EF614258         |
| 8619                                           | <i>Eidolon helvum</i> (straw-coloured fruit bat)               | Nigeria            | 1956 | LBV           | II         | V/PV       | na                                      | KU761303         |
| Lagos Bat Virus NIG56-RV1                      | <i>Eidolon helvum</i> (straw-coloured fruit bat)               | Nigeria            | 1956 | LBV           | II         | PV         | na                                      | EF547431         |
| Lagos Bat Virus SA2004                         | <i>Epomophorus wahlbergi</i> (Wahlberg's epauletted fruit bat) | South Africa       | 2004 | LBV           | II         | PV         | na                                      | EF547428         |
| Mokola Virus NIG68.RV4                         | <i>Crocidura sp.</i> (shrews)                                  | Nigeria            | 1968 | MOK           | II         | PV         | na                                      | HM623780         |
| Mokola Virus 98/071 RA361                      | <i>Felis catus</i> (domestic cat)                              | South Africa       | 1998 | MOK           | II         | PV         | na                                      | GG500108         |
| Ikoma virus                                    | <i>Civettictis civetta</i> (African civet)                     | Tanzania           | 2009 | IKOV          | IV         | PV         | na                                      | JX193798         |

**Appendix Table S4. Summary of the characteristics of the 71 lyssaviruses tested in this study.**

|                      | Ag site I |      |      | Ag site III |      |              |      |      |              |      |      |      |              |      |      | Number of isolates | RABV deaths/year |              |
|----------------------|-----------|------|------|-------------|------|--------------|------|------|--------------|------|------|------|--------------|------|------|--------------------|------------------|--------------|
|                      | L231      | S231 | P231 | V332        | I332 | (Others) 332 | R333 | K333 | (Others) 333 | N336 | D336 | S336 | (Others) 336 | I338 | V338 |                    |                  | (Others) 338 |
| <b>Worldwide</b>     | 67,6      | 17,3 | 14,7 | 77          | 22,9 | 0,08         | 96,2 | 2,77 | 1,01         | 90,6 | 3,59 | 5,66 | 0,20         | 93,7 | 6,16 | 0,12               | 2563             | 55000        |
| <b>Africa</b>        | 100       | 0    | 0    | 68,8        | 31,2 | 0,00         | 100  | 0    | 0,00         | 40,9 | 59,1 | 0    | 0,00         | 100  | 0    | 0,00               | 93               | 24000        |
| <b>Asia</b>          | 92,4      | 0,09 | 7,47 | 65,4        | 34,5 | 0,09         | 99,3 | 0    | 0,72         | 99,4 | 0,45 | 0    | 0,18         | 99,9 | 0,09 | 0,00               | 1111             | 31000        |
| <b>Europa</b>        | 95,8      | 0,42 | 0,42 | 99,6        | 0,42 | 0,00         | 100  | 0    | 0,00         | 100  | 0    | 0    | 0,00         | 93,7 | 6,33 | 0,00               | 237              | <10          |
| <b>North America</b> | 21,9      | 47   | 31,1 | 88          | 11,9 | 0,11         | 91,6 | 7,37 | 0,99         | 80,3 | 3,41 | 16   | 0,33         | 85   | 14,6 | 0,33               | 909              | >10          |
| <b>South America</b> | 87,8      | 7,04 | 5,16 | 69          | 31   | 0,00         | 93,9 | 1,88 | 4,23         | 99,5 | 0,47 | 0    | 0,00         | 95,8 | 4,23 | 0,00               | 213              | <10          |

**Appendix Table S5. Geographic distribution of the antigenic site I and III polymorphisms of the 2566 RABV isolates analyzed.**

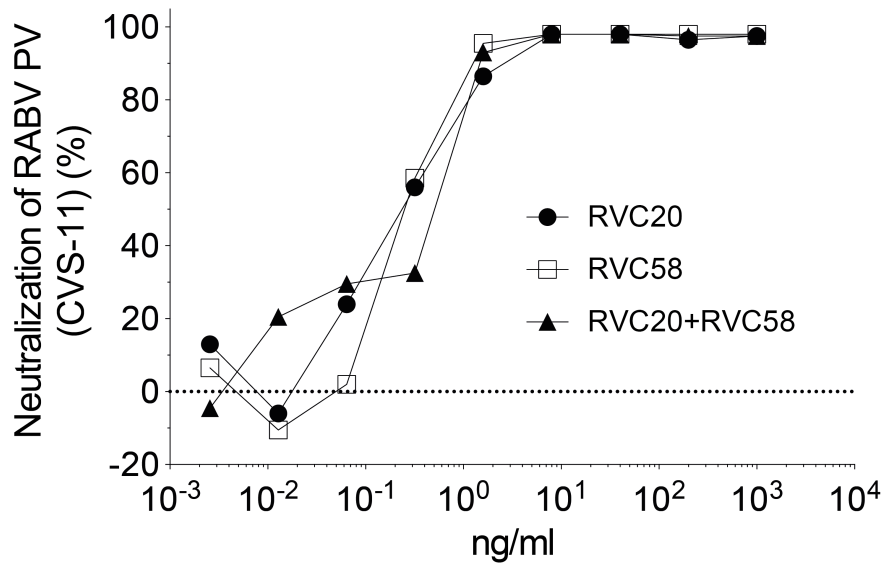

|             | IC50   | IC90  |
|-------------|--------|-------|
| RVC20       | 0.2275 | 2.237 |
| RVC58       | 0.2651 | 0.784 |
| RVC20+RVC58 | 0.5451 | 1.447 |

**Appendix Figure S1. Neutralization of CVS-11 RABV by RVC20 and RVC58 antibodies combinations.** RVC20 and RVC58 antibodies were tested individually or as 1:1 cocktail. Shown is the concentration of total amount of the two antibodies in the cocktail.
