# Supplementary material for: Development of broad‐spectrum human monoclonal antibodies for rabies post‐exposure prophylaxis
Source: PubMed Central journal article supplement (PMC4818751; doi:10.15252/emmm.201505986), 2016-03-18
Supplement: EMMM-8-407-s002.pdf [file EMMM-8-407-s002.pdf]

## Expanded View Figures

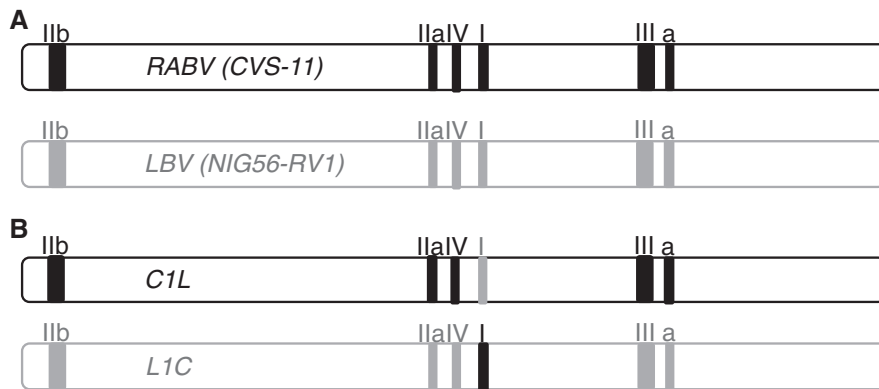

**Figure EV1. Schematic showing generation of epitope swapped G proteins.**

**A** Wild-type G genes from RABV (CVS-11) and LBV (NIG56-RV1) isolates are shown with known epitopes highlighted by the solid boxes. Using overlap extension PCR (Heckman & Pease, 2007), we were able to generate matching sets of G genes for which each epitope in turn had been swapped from CVS-11 to LBV and vice versa.

**B** Examples of the chimeric G genes generated when antigenic site I was swapped.

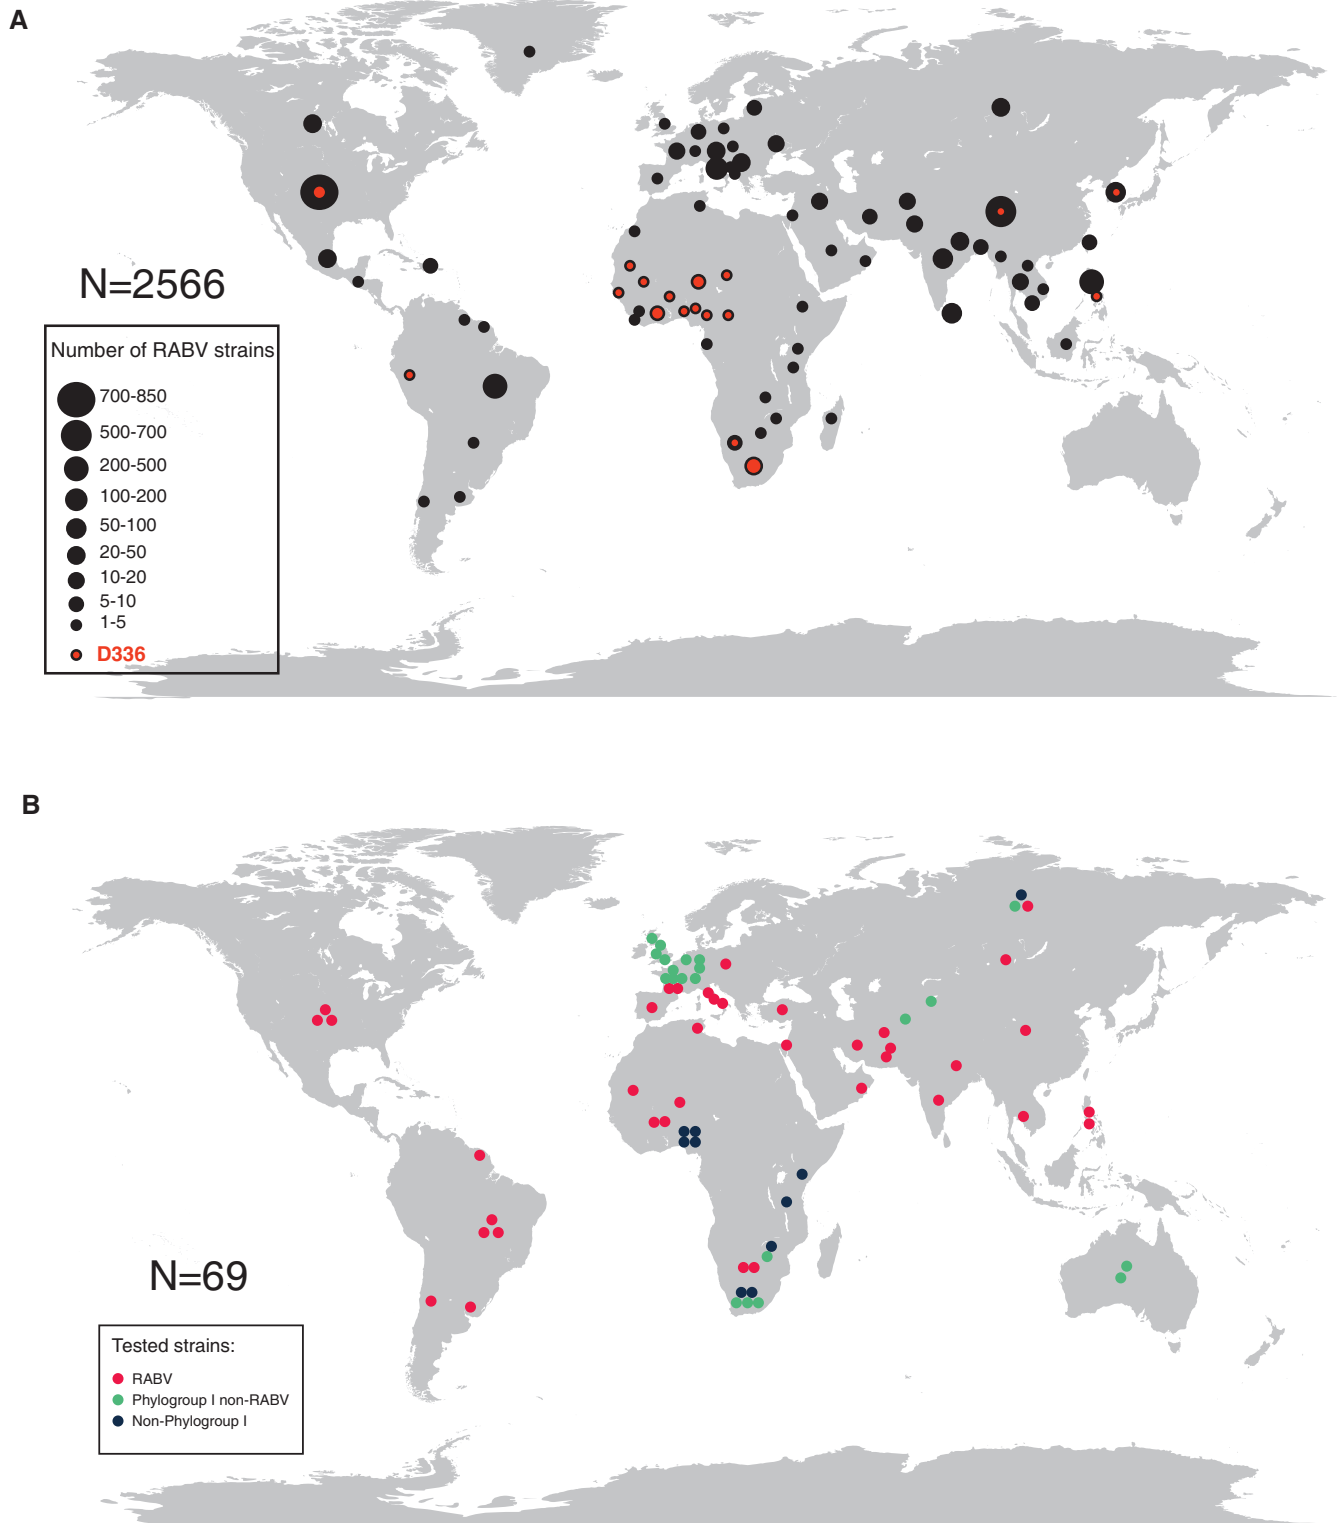

**Figure EV2. World maps showing the geographic distribution of the analyzed lyssaviruses.**

A Geographic origin of the 2,566 RABV strains used for the analysis of RVC58 and RVC20 epitope conservation. Dot size is proportional to the number of isolates as indicated in the legend.

B Geographical origin of the viruses tested in this study.

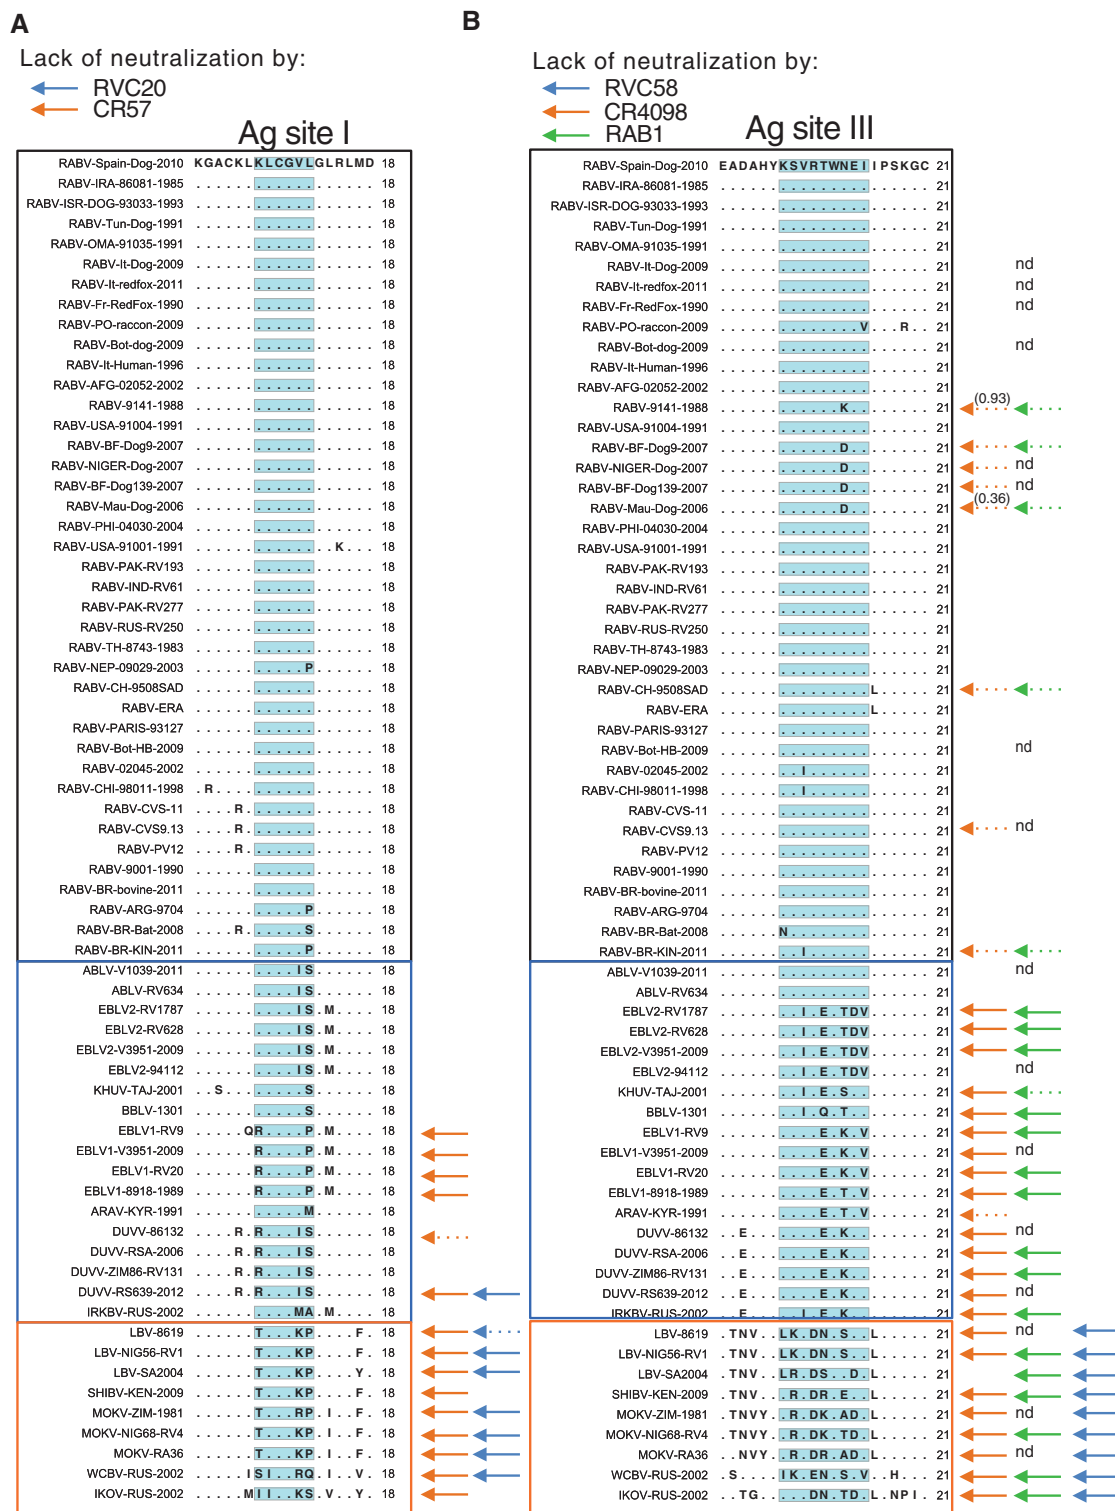

**Figure EV3. Alignment of antigenic site sequences of the G protein from all the tested lyssaviruses.**

Highlighted in blue and orange are phylogroup I non-RABV and phylogroup II-IV non-RABV lyssaviruses, respectively. Nd, not tested.

A Antigenic site I.  
 B Antigenic site III.

A

| Position | Consensus sequence KLCGVL | Amino acid Frequency (%) | Neutralization by RVC20 | Neutralization by CR57 |
|----------|---------------------------|--------------------------|-------------------------|------------------------|
| 226      | K.....                    | 99,73                    | +                       | +                      |
|          | R.....                    | 0,2                      | +                       | -                      |
| 231      | .....L                    | 67,65                    | +                       | +                      |
|          | .....S                    | 17,30                    | +                       | +                      |
|          | .....P                    | 14,73                    | +                       | +                      |
|          | .....H                    | 0,31                     | ?                       | ?                      |

B

| Position | Consensus sequence KSVRTWNEI | Amino acid Frequency (%) | Neutralization by RVC58 | Neutralization by CR4098 | Neutralization by RAB1 |
|----------|------------------------------|--------------------------|-------------------------|--------------------------|------------------------|
| 330      | K.....                       | 99.61                    | +                       | +                        | +                      |
|          | N.....                       | 0.27                     | +                       | +                        | +                      |
| 331      | .S.....                      | 99.96                    | +                       | +                        | +                      |
| 332      | .V.....                      | 77.05                    | +                       | +                        | +                      |
|          | .I.....                      | 22.88                    | +                       | +                        | +                      |
| 333      | ...R.....                    | 96.22                    | +                       | +                        | +                      |
| 334      | ...T....                     | 99.65                    | +                       | +                        | +                      |
|          | ...N....                     | 0.35                     | -*                      | -*                       | -*                     |
| 335      | .....W...                    | 99.73                    | +                       | +                        | +                      |
|          | .....L...                    | 0.27                     | ?                       | ?                        | ?                      |
| 336      | .....N..                     | 90.57                    | +                       | +                        | +                      |
|          | .....D..                     | 3.59                     | +                       | -                        | -                      |
|          | .....S..                     | 5.65                     | +**                     | -                        | -                      |
|          | .....G..                     | 0.12                     | ?                       | ?                        | ?                      |
| 337      | .....K..                     | 0.08                     | +                       | -                        | -                      |
|          | .....E..                     | 99.61                    | +                       | +                        | +                      |
|          | .....D..                     | 0.35                     | +                       | -                        | -                      |
| 338      | .....K..                     | 0.04                     | ?                       | ?                        | ?                      |
|          | .....I..                     | 93.73                    | +                       | +                        | +                      |
|          | .....V..                     | 6.16                     | +                       | +/-                      | +/-                    |

\*, phylogroup 2 viruses carry N in this position and are not neutralized by either RVC58 and CR4098

\*\*\*, phylogroup 2 viruses carry S (LBV) and not neutralized by RVC58

+/-, indicates that the Ab neutralizes some but not all viruses carrying the indicated residue

**Figure EV4.** Level of amino acid residue conservation in antigenic site I (A) and antigenic site III (B) calculated by the analysis of the G-protein sequences from 2,566 RABV isolates as shown in Fig 6.

A, B Shown is a summary of the viruses neutralized by the indicated monoclonal antibodies.
